# Supplementary material for: Synthesis of low dispersity star-like polyethylene: a combination of click chemistry and a sol–gel process
Source: Royal Society of Chemistry journal article supplement (doi:10.1039/c4py00063c), 2014-01-01
Supplement: c4py00063c1.pdf [file c4py00063c1.pdf]

*Supporting Information for:*

## **Synthesis of Low Dispersity Star-like Polyethylene: a Combination of Click Chemistry and Sol-gel Process**

Yongjie Zhang<sup>a,b</sup>, Huayi Li<sup>a,\*</sup>, Zenan Xu<sup>a,b</sup>, Wensheng Bu<sup>a</sup>, Chenyang Liu<sup>a</sup>, Jin-Yong Dong<sup>a,\*</sup>, Youliang Hu<sup>a</sup>

<sup>a</sup> Beijing National Laboratory of Molecular Sciences, CAS Key Laboratory of Engineering Plastics, Joint Laboratory of Polymer Science and Materials, Institute of Chemistry, Chinese Academy of Sciences, Beijing 100190, PR China.

<sup>b</sup> University of Chinese Academy of Sciences, Beijing 100049, PR China.

\* Corresponding authors: Huayi Li (lihuayi@iccas.ac.cn) or Jin-Yong Dong (jydong@iccas.ac.cn)

### **Materials and methods**

#### ***Materials***

Toluene was deoxygenated by nitrogen purge before refluxing for 48 h, and then distilled over sodium. High-purity nitrogen was used as received.

Dibutyltin maleate (DBTM, 95%) and 1,1'-Azobis(cyclohexanecarbonitrile) (ABCN, 98%), from Aladdin Industrial Inc., (3-mercaptopropyl)trimethoxysilane (MPTMS, 95%) from J&K Scientific, were used as received. vinyl-terminated polyethylene was synthesized as described before.<sup>1</sup> HDPE (DGDB-2480, Melt Flow Index (190°C/2.16kg)=0.1 g/10 min) was purchased from SINOPEC Qilu Company.

All synthesis procedures with air-sensitive compounds were performed under inert gas atmosphere using a syringe and standard Schlenk techniques.

#### ***Synthesis of TMS-PE1***

To a solution of v-PE1 (7 g, 1.1 mmol, 1 eq.) in 150 ml toluene, MPTMS (10 g, 4.6 eq.) and ABCN (2 g, 0.7 eq.) were added. The mixture was then heated to 85°C. After stirring for 12 h, the reaction mixture was precipitated in methanol, and filtered, and the product was

---

washed with methanol and dried under vacuum at 40°C to give TMS-PE. 8.3 g light yellow solid was obtained.

#### ***Synthesis of TMS-PE2***

To a solution of v-PE2 (4.6 g, 3.3 mmol, 1 eq.) in 150 ml toluene, MPTMS (6 g, 9 eq.) and ABCN (0.73 g, 0.9 eq.) were added. The mixture was then heated to 90°C. After stirring for 12 h, the reaction mixture was precipitated in methanol, and filtered, and the product was washed with methanol and dried under vacuum at 40°C to give TMS-PE. 5.1 g light yellow solid was obtained.

#### ***Synthesis of sPE1***

To a solution of TMS-PE1 (0.9 g, 1.1 mmol, 1 eq.) in 10 ml toluene, solution of DBTM in toluene (0.1 eq.) and deionized water (0.1 ml, 55 mol, 50 e.q.) were added. The mixture was then heated to 120°C. After stirring for 22 h, the reaction mixture was precipitated in methanol, and filtered, and the product was washed with methanol and dried under vacuum at 40°C to give sPE1a. 0.72 g white fine powder was obtained.

#### ***Synthesis of sPE1a***

To a solution of TMS-PE1 (3.6 g, 4.4 mmol, 1 eq.) in 40 ml toluene, solution of DBTM in toluene (0.1 eq.) and deionized water (0.4 ml, 220 mmol, 50 e.q.) were added. The mixture was then heated to 120°C. After stirring for 22 h, the reaction mixture was precipitated in methanol, and filtered, and the product was washed with methanol and dried under vacuum at 40°C to give sPE1b. 3.2 g white fine powder was obtained.

#### ***Synthesis of sPE2***

To a solution of TMS-PE2 (2.5 g, 1.6 mmol, 1 eq.) in 30 ml toluene, solution of DBTM in toluene (0.1 eq.) and deionized water (0.15 ml, 83 mmol, 53 e.q.) were added. The mixture was then heated to 120°C. After stirring for 22 h, the reaction mixture was precipitated in

---

methanol, and filtered, and the product was washed with methanol and dried under vacuum at 40°C to give sPE2. 2.15 g white solid was obtained.

### ***Preparation of HDPE/sPE blends***

HDPE/sPE blends were prepared via solution mixing method in xylene at 130°C.

### ***Analysis***

Solid  $^{29}\text{Si}/^{13}\text{C}$  NMR and high-temperature  $^1\text{H}/^{13}\text{C}$  NMR spectrums were recorded on Bruker III 400 and Bruker DMX 300 instruments, respectively. In solid NMR analyses, 4 mm MAS BB/BB/1H (sPE1 and sPE1a) and 7 mm MAS BB/1H (sPE2) probes were used with spinning speeds up to 5.0 kHz. The melting temperature of the polymers was measured by Differential Scanning Calorimetry (DSC) using a TA Instrument Q2000 with a heating rate of 10°C/min. The molecular weight (MW) and dispersity ( $\bar{D}$ ) values of polymers were determined by Gel Permeation Chromatography (GPC) using an Alliance PL-GPC 220 instrument equipped with a refractive index detector (890 nm), a PL-GPC 220 viscometer (four-bridge capillary viscometer), a PL-GPC 220 light scattering detector (Rayleigh scattering angles, 15° and 90°; laser wavelength, 658 nm) and three PLgel 10  $\mu\text{m}$  MIXED-B columns. The measurement was performed at 150°C with 1,2,4-trichlorobenzene as the eluent at a flow rate of 1.0 ml/min. Narrow-molecular-weight-distribution polystyrene samples were used as standards for calibration ( $M_p$  ranging from 580 to 6,870,000 g/mol). TG analyses were performed at a heating rate of 10°C/min in air atmosphere from 50 to 800°C on Perkin-Elmer TGA-7 instrument. FT-IR analyses were performed on a Bruker Tensor 27 FT-IR Instrument. Melt rheological behavior measurements of HDPE and HDPE/sPE blends were performed with a TA ARES-G2 rheometer at 200°C in the oscillatory mode (dynamic frequency sweep, 5 % strain, 0.1-100 rad/s). A parallel plate geometry of 25 mm diameter and a gap of 1.5 mm was used for the tests.

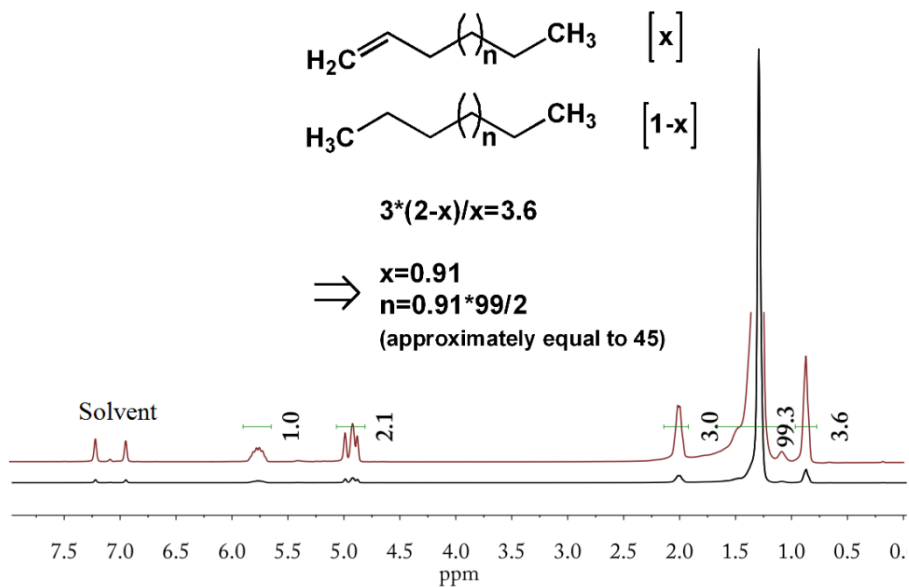

Figure S1.  $^1\text{H}$  NMR spectrum of v-PE1 (1,2-Dichlorobenzene- $d_4$ )

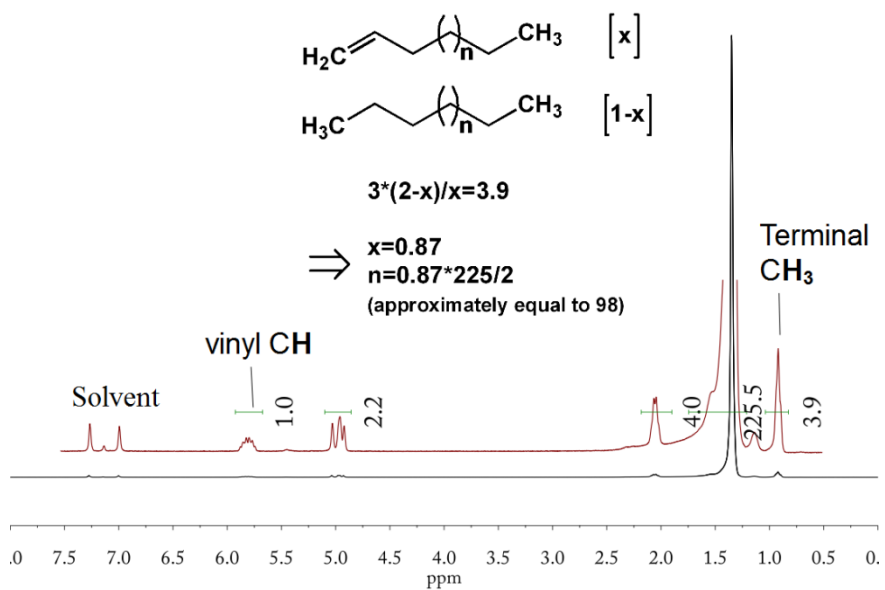

Figure S2.  $^1\text{H}$  NMR spectrum of v-PE2 (1,2-Dichlorobenzene- $d_4$ )

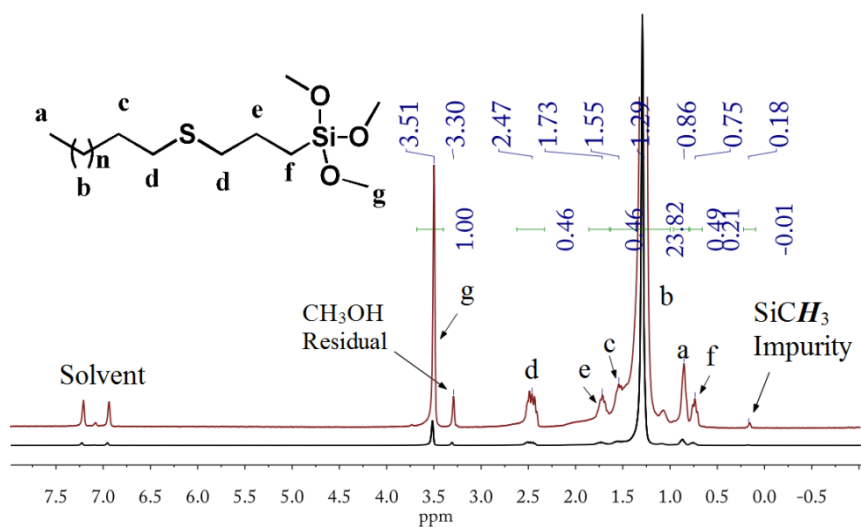

Figure S3. <sup>1</sup>H NMR spectrum of TMS-PE2 (1,2-Dichlorobenzene-d<sub>4</sub>)

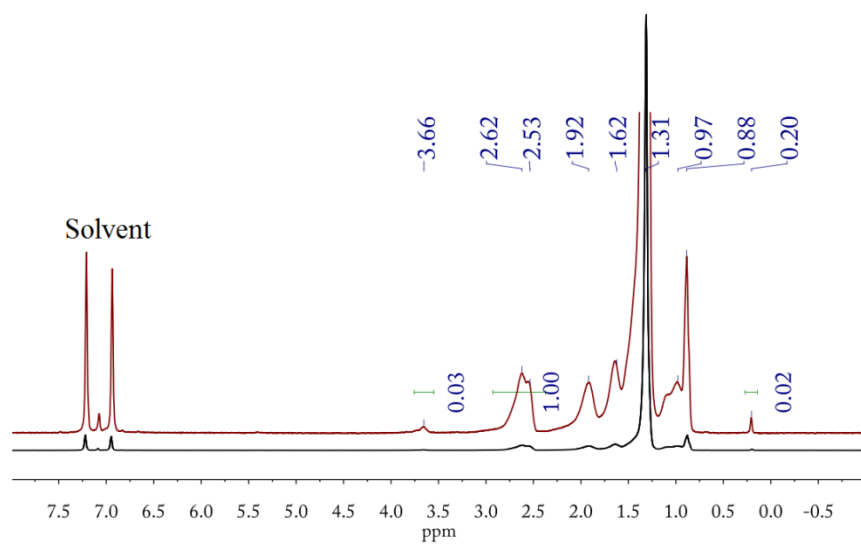

Figure S4. <sup>1</sup>H NMR spectrum of sPE1a (1,2-Dichlorobenzene-d<sub>4</sub>)

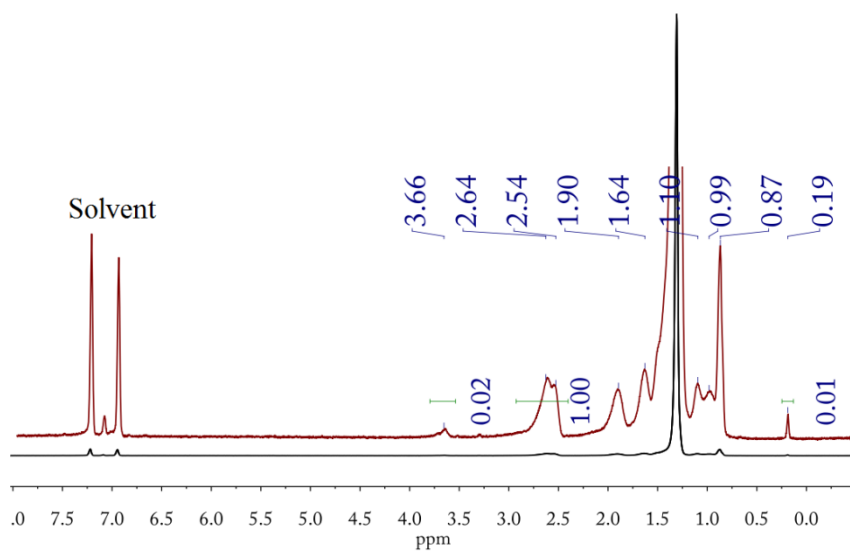

Figure S5.  $^1\text{H}$  NMR spectrum of sPE2 (1,2-Dichlorobenzene- $d_4$ )

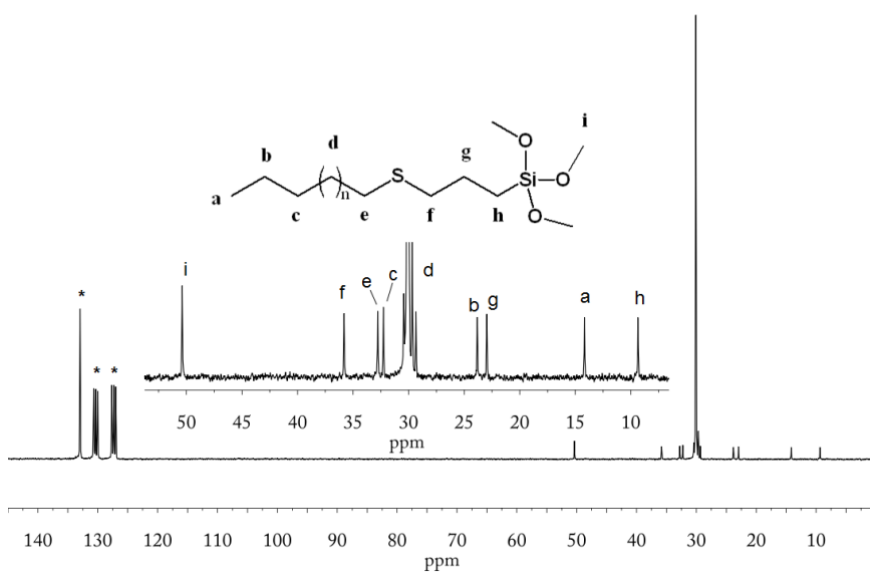

Figure S6.  $^{13}\text{C}$  NMR spectrum of TMS-PE1 (1,2-Dichlorobenzene- $d_4$ )

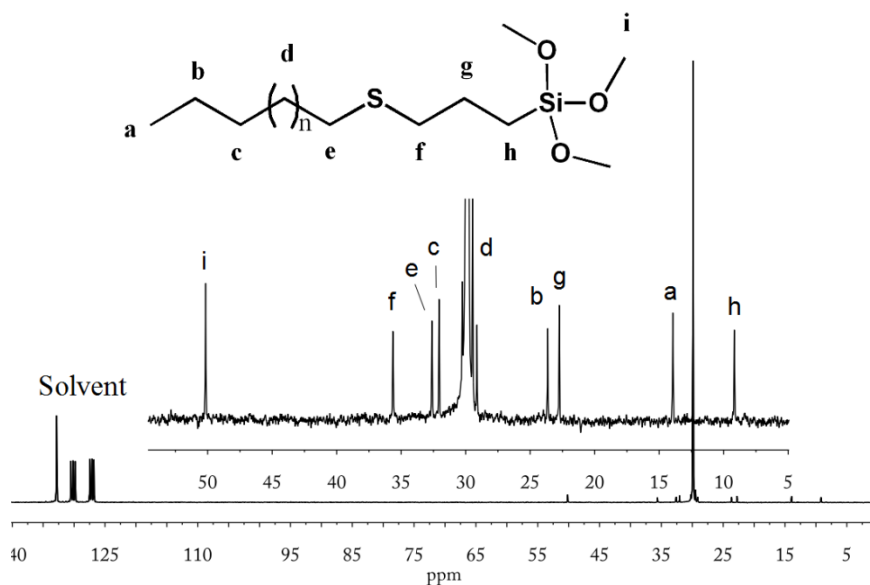

Figure S7. <sup>13</sup>C NMR spectrum of TMS-PE2 (1,2-Dichlorobenzene-d4)

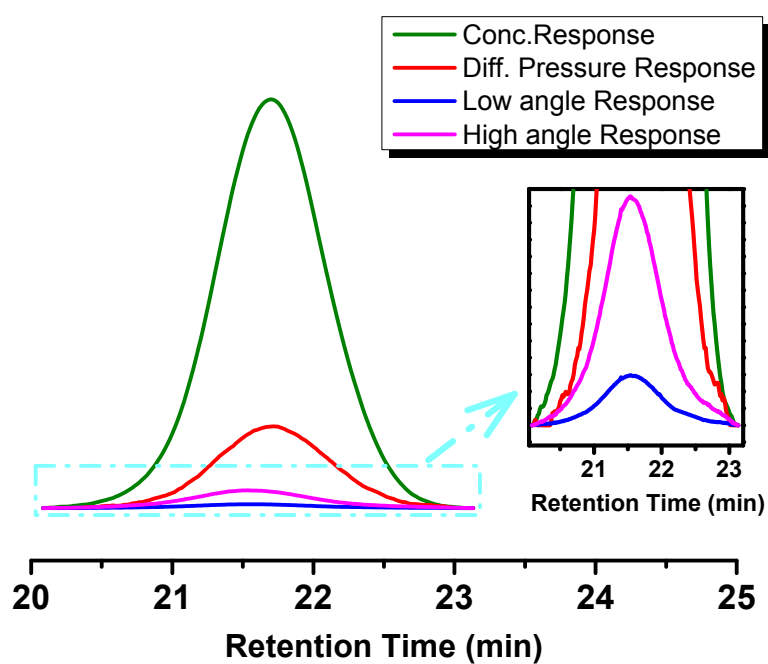

Figure S8. GPC traces of sPE1

Conc. Response (concentration response) stands for response from refractive index detector;

Diff. Pressure Response (differential pressure response) stands for response from viscometer;

---

High and Low angle Response stand for response from light scattering detector at 90° and 10°, respectively. Same as below.

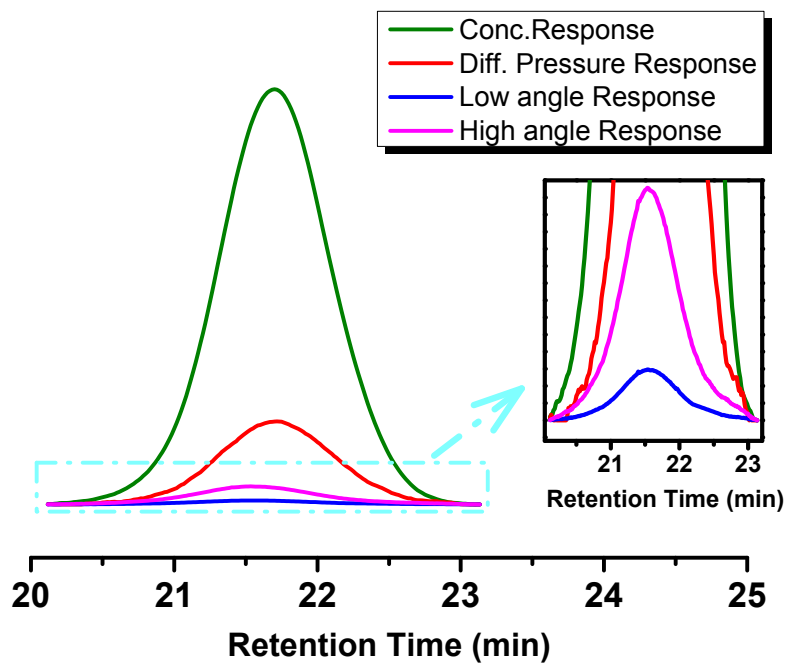

Figure S9. GPC traces of sPE1a



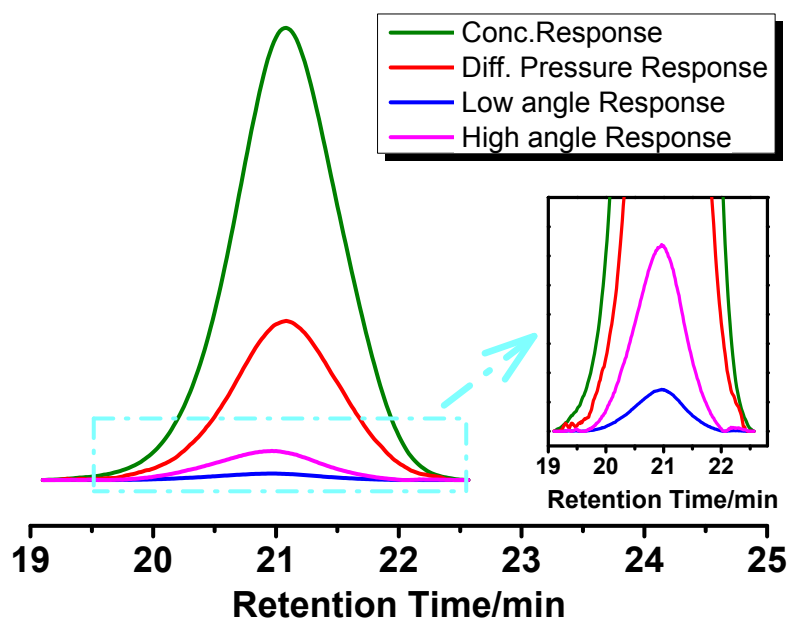

Figure S10. GPC traces of sPE2

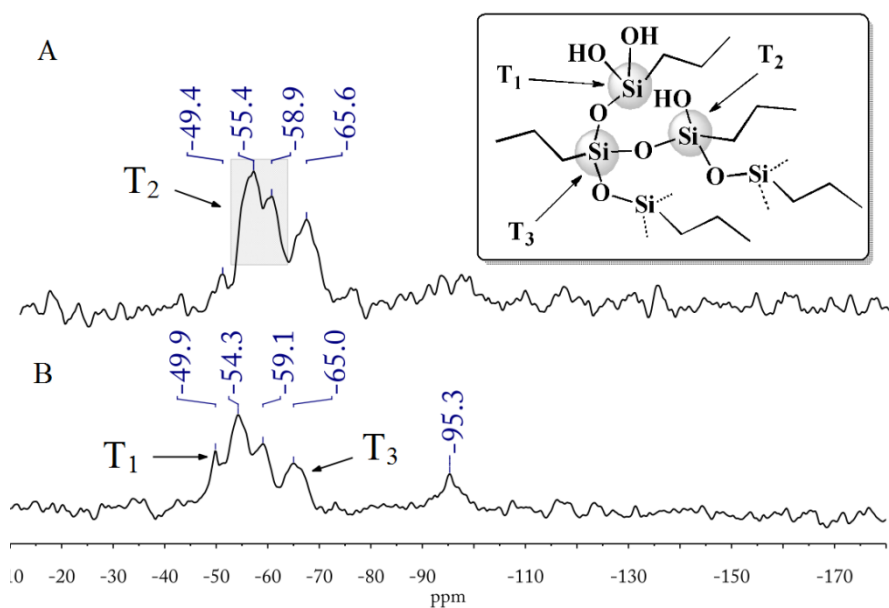

Figure S11. CP-MAS Solid  $^{29}\text{Si}$  NMR of sPE1 (upper) and sPE1a (lower) (130 mg, 5 kHz, 4 mm MAS BB/BB/ $^1\text{H}$ , NS 20000)

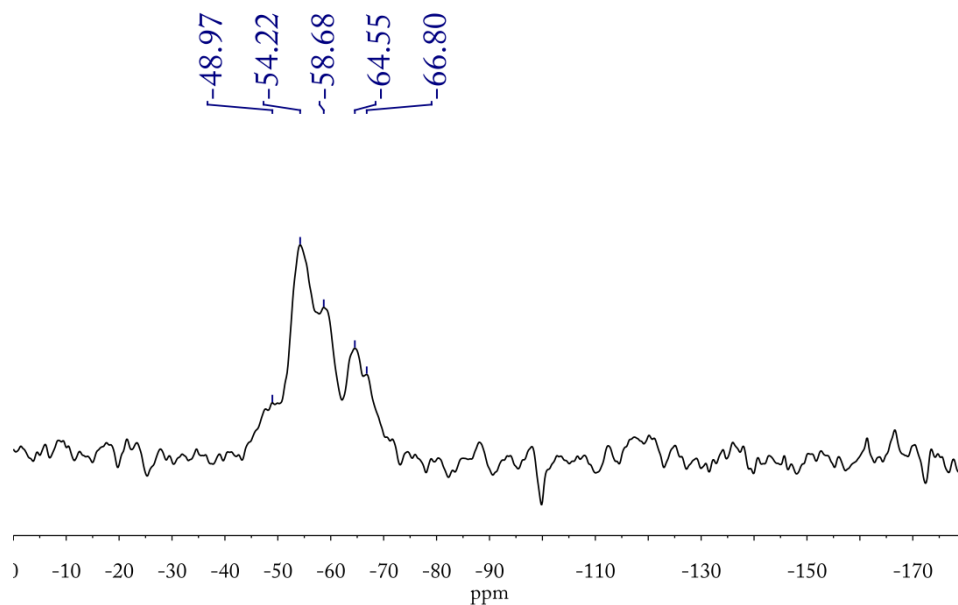

Figure S12. CP-MAS Solid  $^{29}\text{Si}$  NMR of sPE2 (150 mg, 5 kHz, 7 mm MAS BB/1H, NS 20480)

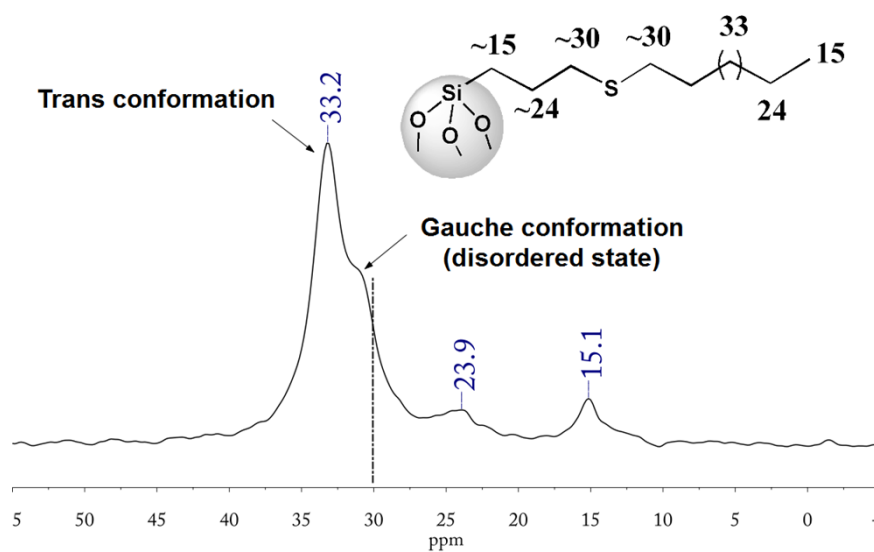

Figure S13. CP-MAS Solid  $^{13}\text{C}$  NMR of sPE1 (130 mg, 5 kHz, 4.0 mm MAS BB/BB/1H, NS 1914)

(Spectrum is shown along with the peak assignments based on previous studies.<sup>2-6</sup>)

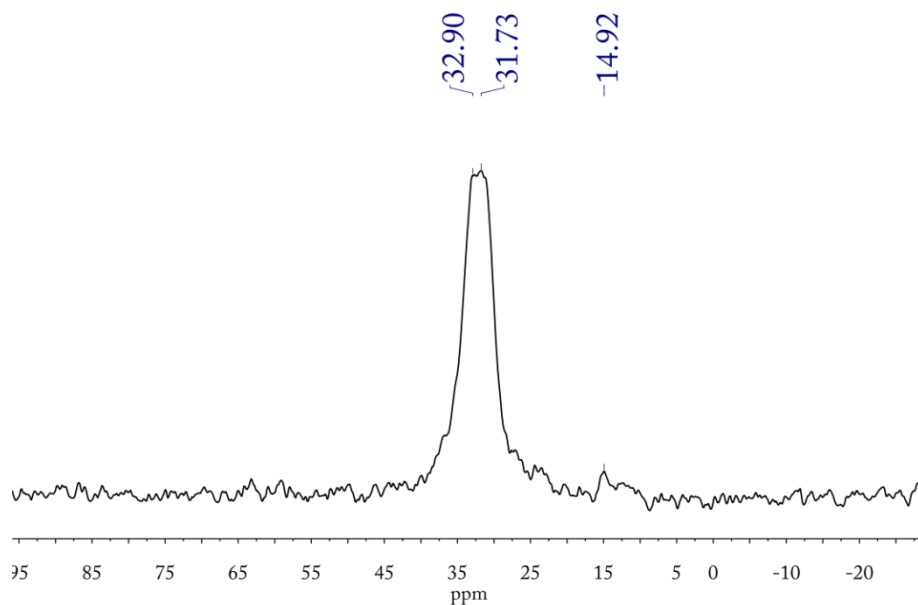

Figure S14. CP-MAS Solid  $^{13}\text{C}$  NMR of sPE2 (150 mg, 5 kHz, 7.0 mm MAS BB/1H, NS 3688)

The longer alkyl chain in sPE2 mainly possesses trans conformation (33-32 ppm) since it is more likely to crystallize for longer alkyl chain and therefore reduce its mobility.

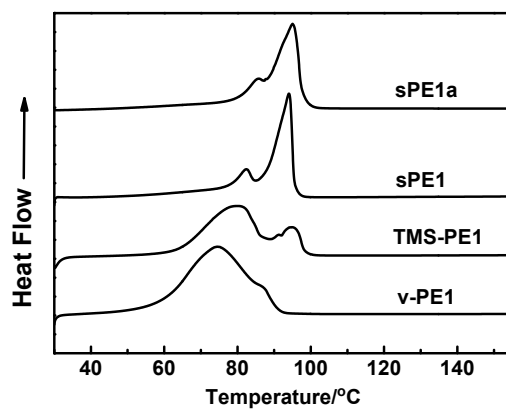

Figure S15. DSC curves of v-PE1, TMS-PE1, sPE1 and sPE1a

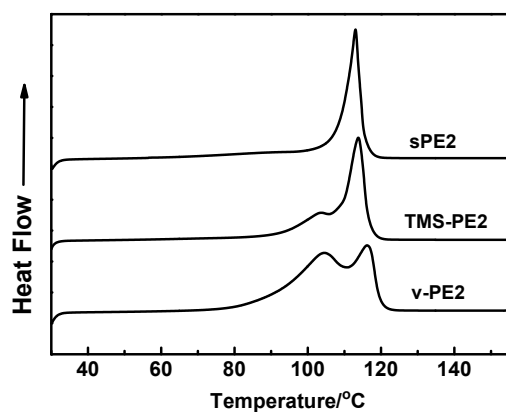

Figure S16. DSC curves of v-PE2, TMS-PE2 and sPE2

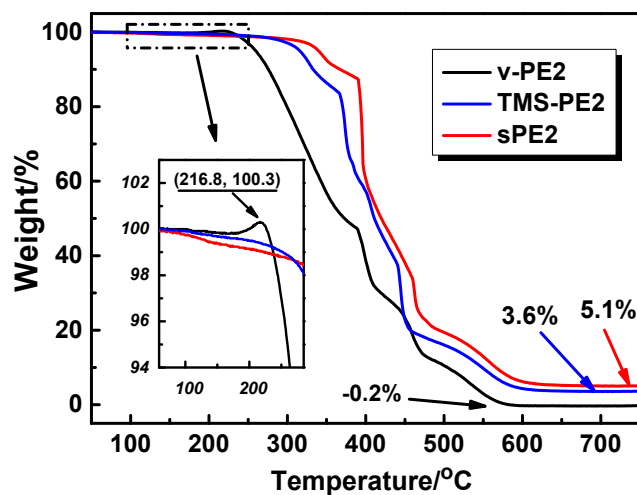

Figure S17. TGA curves of v-PE2, TMS-PE2 and sPE2 in air (10°C/min)

(Inner Picture: Expansion of O<sub>2</sub> uptake region of v-PE2)

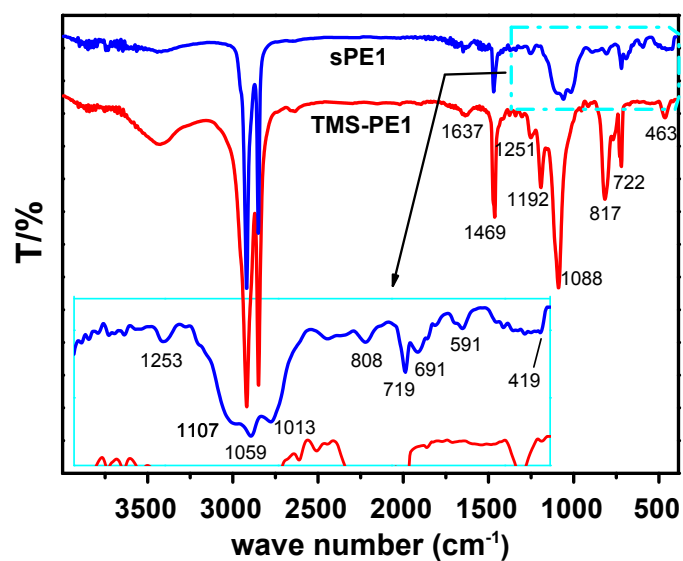

Figure S18. FT-IR spectrums of TMS-PE1 (red) and sPE1 (blue)

Peaks: ( $3429\text{ cm}^{-1}$ ) O-H stretching, ( $2918\text{ cm}^{-1}$ ) and ( $2850\text{ cm}^{-1}$ ) C-H stretching, ( $1469\text{ cm}^{-1}$ ) C-H bending ( $\text{CH}_2$ ), ( $1088\text{ cm}^{-1}$ ) Si-O-C asymmetric stretching, ( $1200\text{-}1000\text{ cm}^{-1}$ ) Si-O-Si stretching, ( $817\text{ cm}^{-1}$ ) Si-O symmetric stretching, ( $719/722\text{ cm}^{-1}$ ) C-C out of plane bending, ( $463\text{ cm}^{-1}$ ) and ( $400\text{-}550\text{ cm}^{-1}$ ) Si-O bending.

Characteristic absorption of Si-O- $\text{CH}_3$  at  $1088\text{ cm}^{-1}$  in former TMS-PE1 became much weaker in spectrum of sPE1 and a group of absorption peaks at  $1200\text{-}1000\text{ cm}^{-1}$  corresponding to Si-O-Si stretching emerged in spectrum of sPE1.

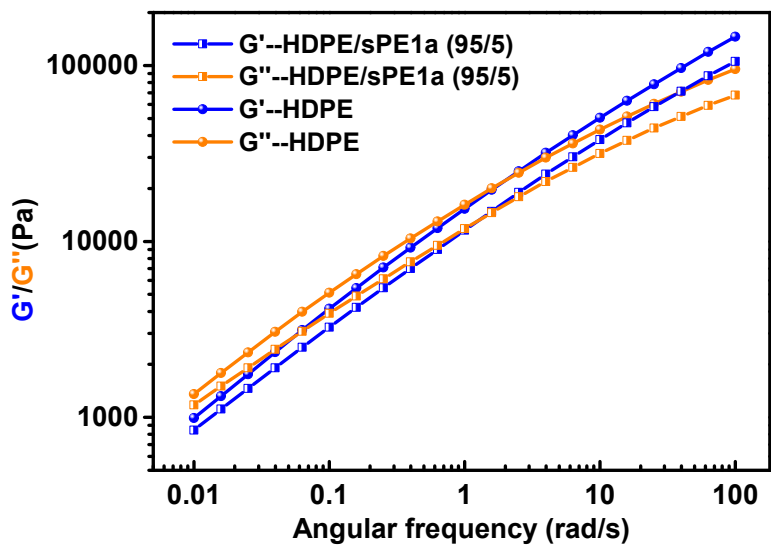

Figure S19. Storage modulus ( $G'$ ) and loss modulus ( $G''$ ) versus angular frequency curves at 200°C for HDPE and HDPE/sPE1a blend

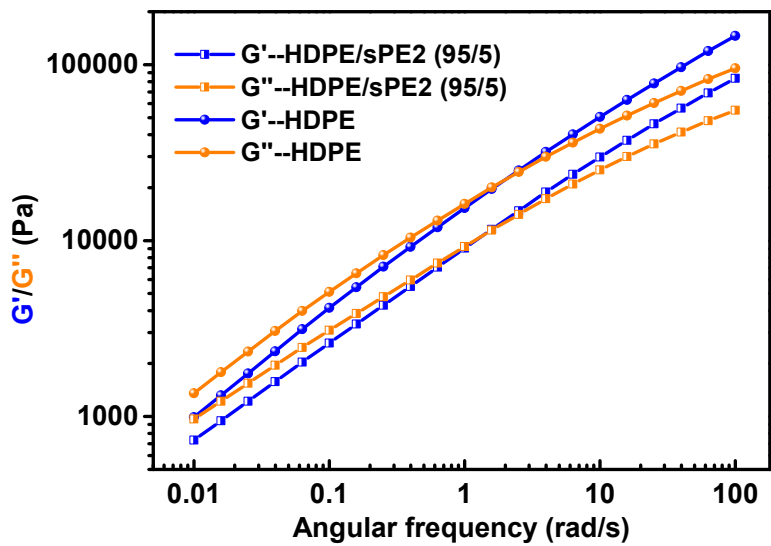

Figure S20. Storage modulus ( $G'$ ) and loss modulus ( $G''$ ) versus angular frequency curves at 200°C for HDPE and HDPE/sPE2 blend

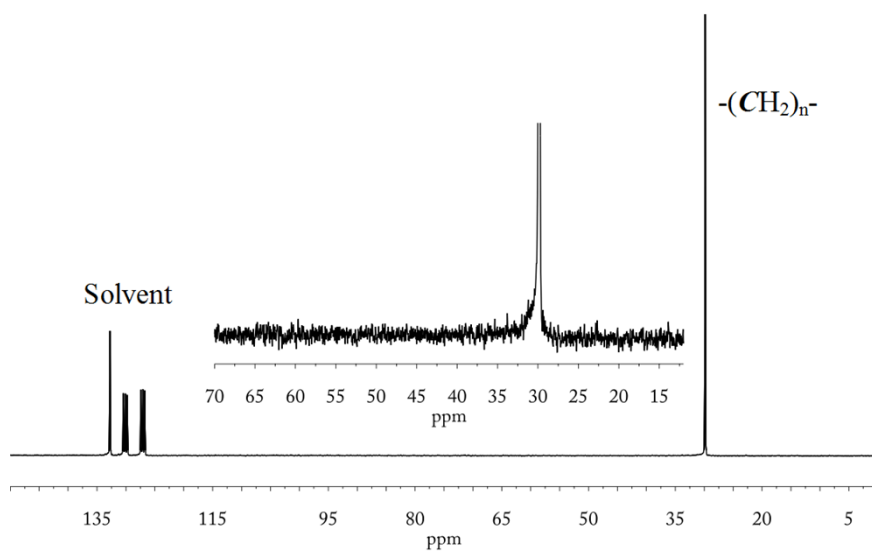

Figure S21.  $^{13}\text{C}$  NMR spectrum of LPE (100 mg in 0.5 ml 1,2-Dichlorobenzene- $d_4$ , 3,000 scans)

Linear structure of LPE is well proved by  $^{13}\text{C}$  NMR spectrum.

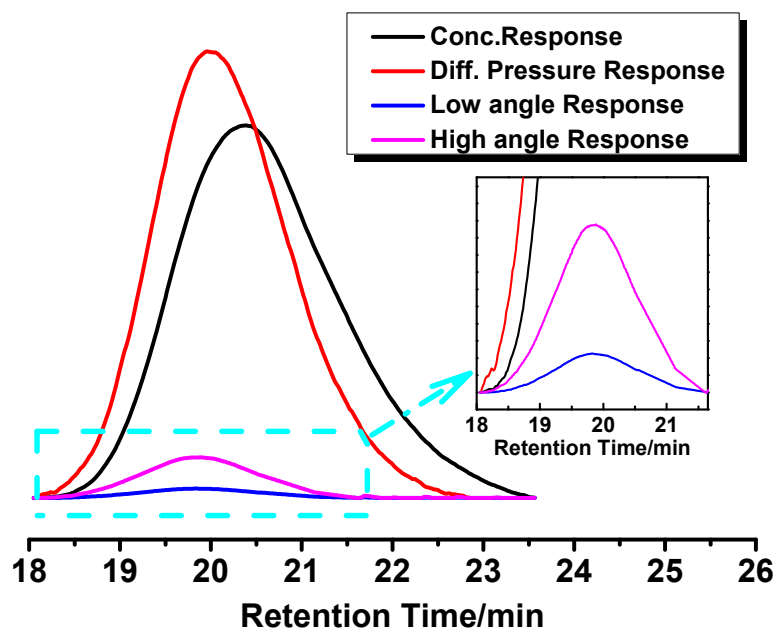

Figure S22. GPC curves of LPE

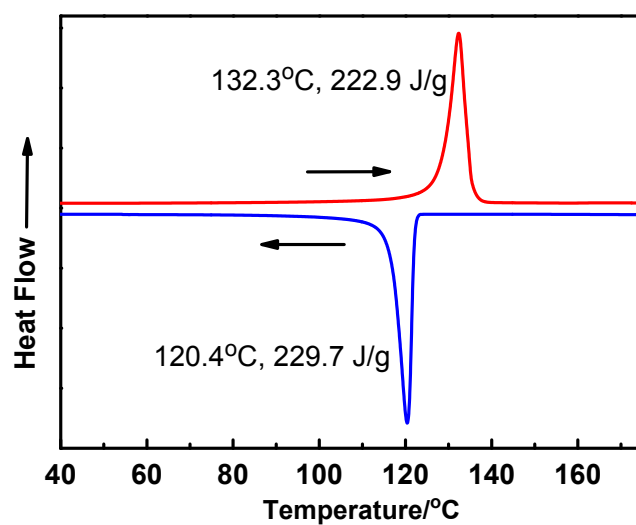

Figure S23. DSC curves of LPE

## References

- 1 Y. Zhang, H. Li, J.-Y. Dong and Y. Hu, *Polym. Chem.*, 2014, **5**, 105-115.
- 2 A. Crisci, M. Tucker, J. Dumesic and S. Scott, *Top Catal.*, 2010, **53**, 1185-1192.
- 3 L. Ni, A. Chemtob, C. Croutxe-Barghorn, J. Brendle, L. Vidal and S. Rigolet, *J. Mater. Chem.*, 2012, **22**, 643-652.
- 4 M. Pursch, R. Brindle, A. Ellwanger, L. C. Sander, C. M. Bell, H. Händel and K. Albert, *Solid State Nucl. Mag.*, 1997, **9**, 191-201.
- 5 J. Cheng, M. Fone and M. W. Ellsworth, *Solid State Nucl. Mag.*, 1996, **7**, 135-140.
- 6 W. Gao and L. Reven, *Langmuir*, 1995, **11**, 1860-1863.
